# Supplementary material
Source: PubMed Central journal article supplement (PMC4480671)
Supplement: 115.111062_ajcn111062SupplementaryData1.pdf [file 115.111062_ajcn111062SupplementaryData1.pdf]

Online Supplemental Material

Supplementary Table 1. Individual carotenoid contents in salad and scrambled whole eggs

|                                 | Lutein<br>(mg) | Zeaxanthin<br>(mg) | $\alpha$ -Carotene<br>(mg) | $\beta$ -Carotene<br>(mg) | Lycopene<br>(mg) |
|---------------------------------|----------------|--------------------|----------------------------|---------------------------|------------------|
| Salad                           | 3.6 $\pm$ 0.1  | 4.9 $\pm$ 0.2      | 2.2 $\pm$ 0.1              | 8.2 $\pm$ 0.4             | 3.8 $\pm$ 0.3    |
| 75g of scrambled<br>whole eggs  | 0.2 $\pm$ 0.0  | 0.4 $\pm$ 0.0      | n/d                        | n/d                       | n/d              |
| 150g of scrambled<br>whole eggs | 0.4 $\pm$ 0.0  | 0.8 $\pm$ 0.1      | n/d                        | n/d                       | n/d              |

Results are reported as mean  $\pm$  SE. n/d: not detected.
