# Supplementary material
Source: PubMed Central journal article supplement (PMC4480671)
Supplement: 115.111062_ajcn111062SupplementaryData2.pdf [file 115.111062_ajcn111062SupplementaryData2.pdf]

Supplementary figure 1

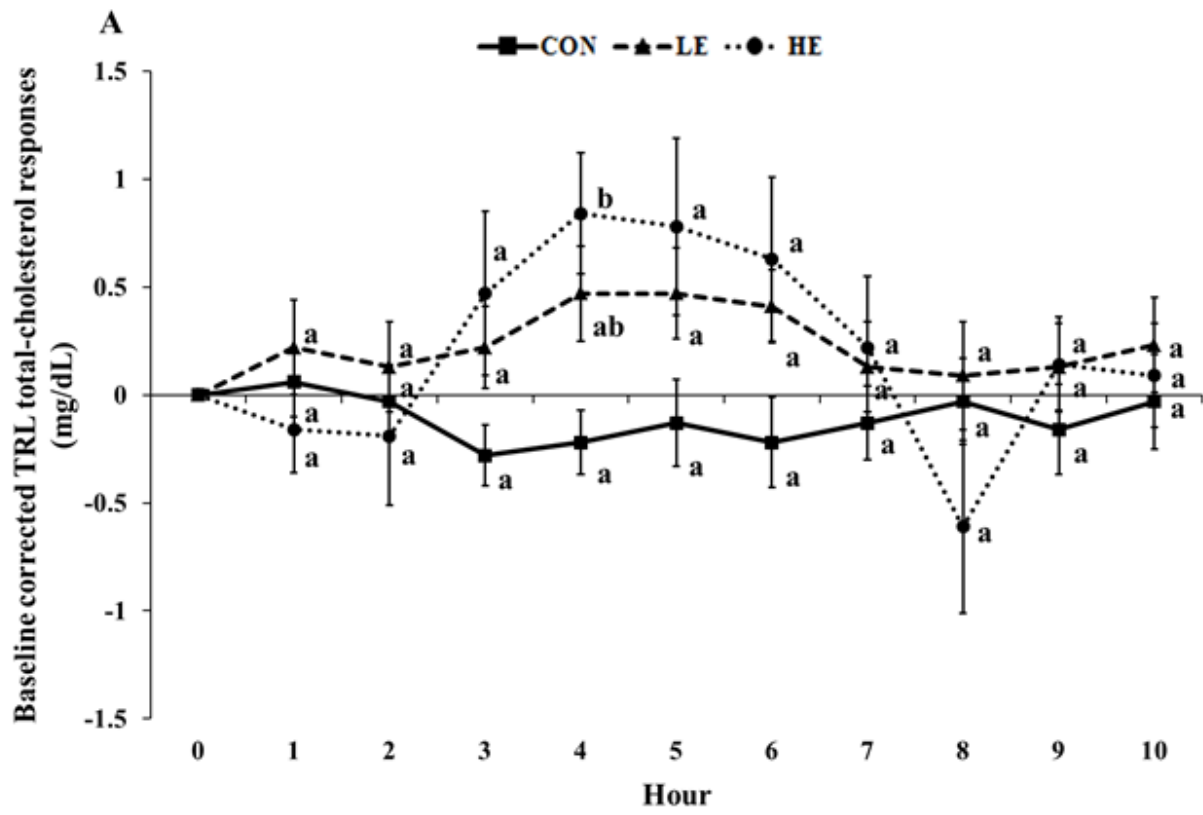

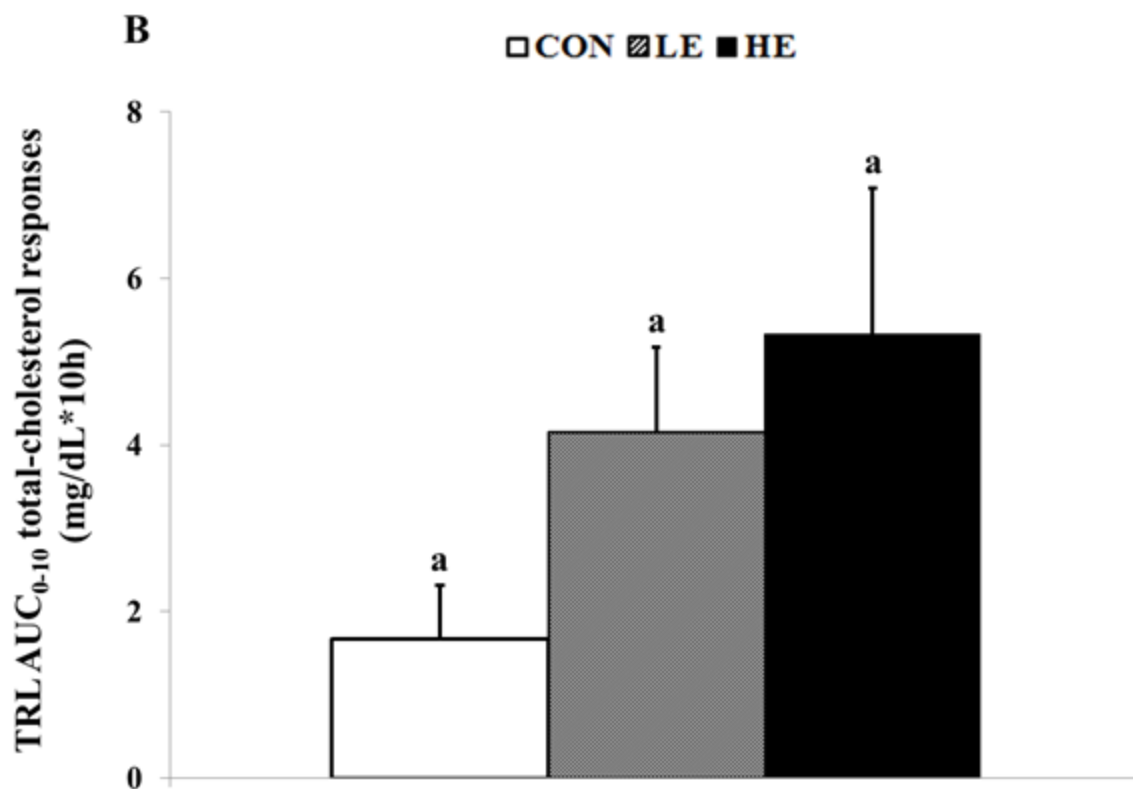

Baseline corrected total-cholesterol content in TRL fraction during the 10 hour testing day (A) and the composite total-cholesterol AUC<sub>0-10h</sub> in TRL fraction (B). Results are reported as mean  $\pm$  SE. Different superscript letters indicate statistical differences among the CON, LE, and HE ( $p < 0.01$ ).
