# Supplementary material
Source: PubMed Central journal article supplement (PMC4480671)
Supplement: 115.111062_ajcn111062SupplementaryData3.pdf [file 115.111062_ajcn111062SupplementaryData3.pdf]

Supplementary figure 2

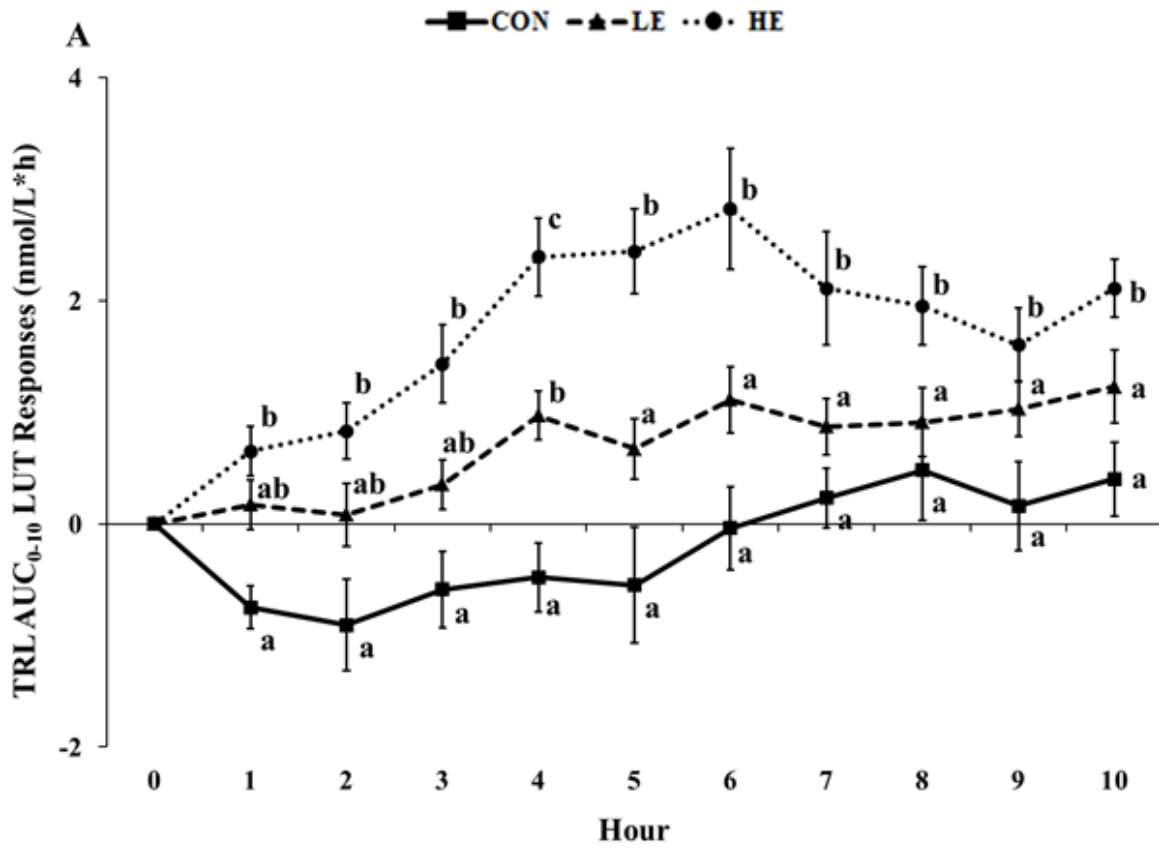

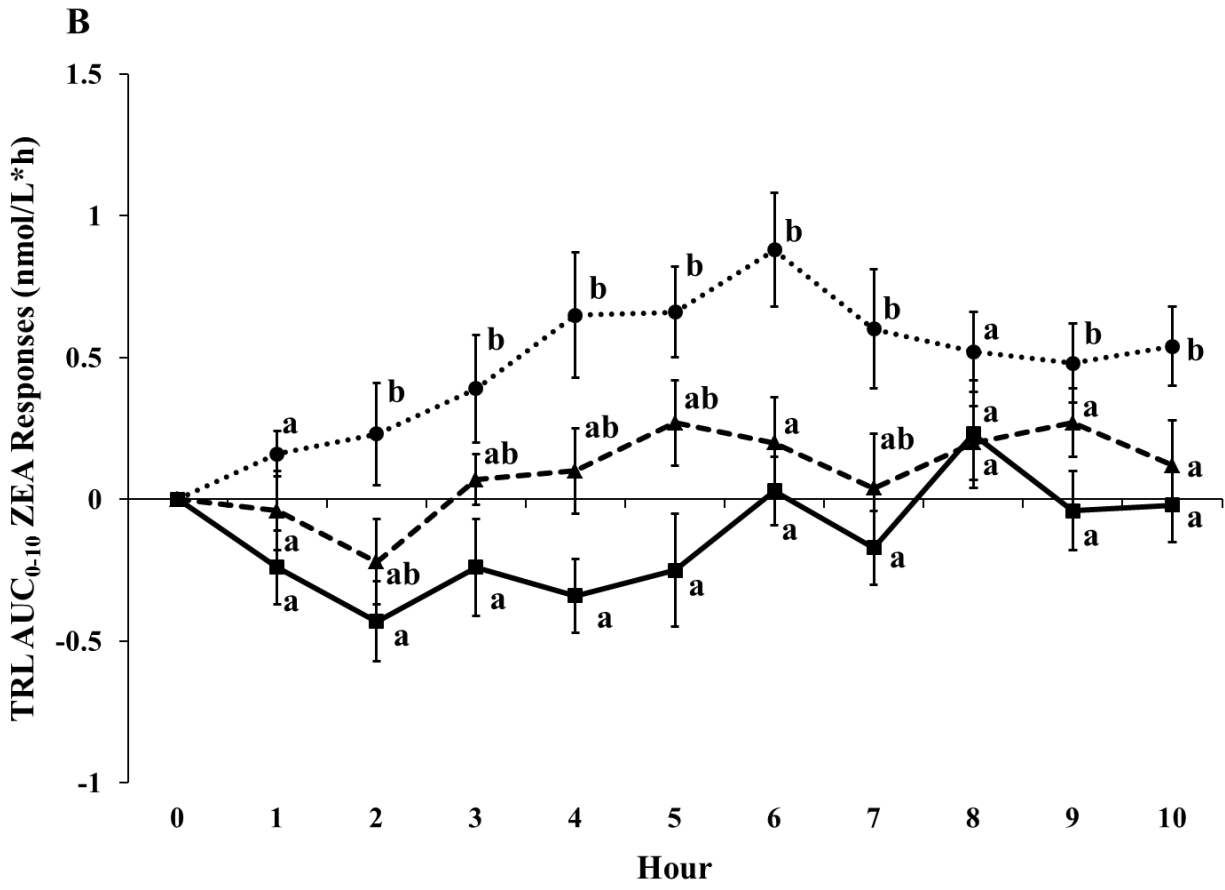

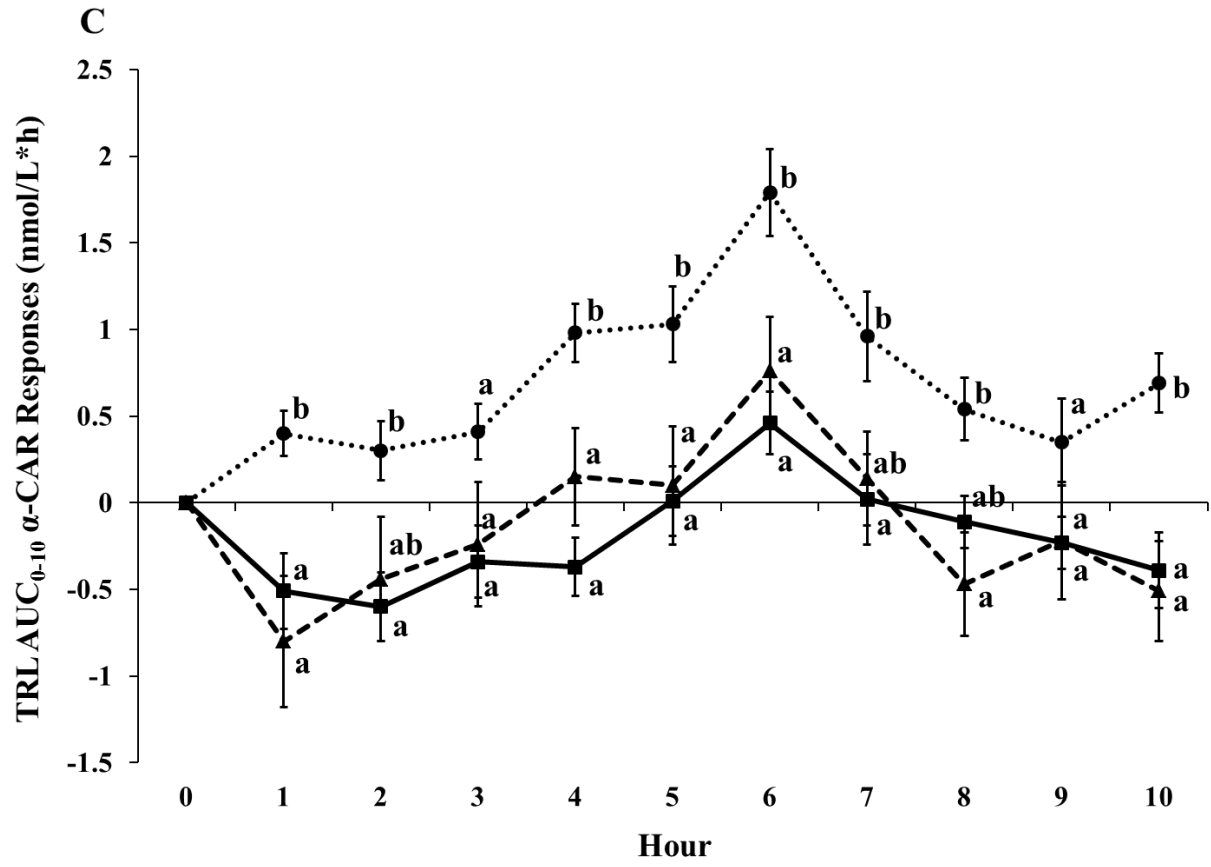

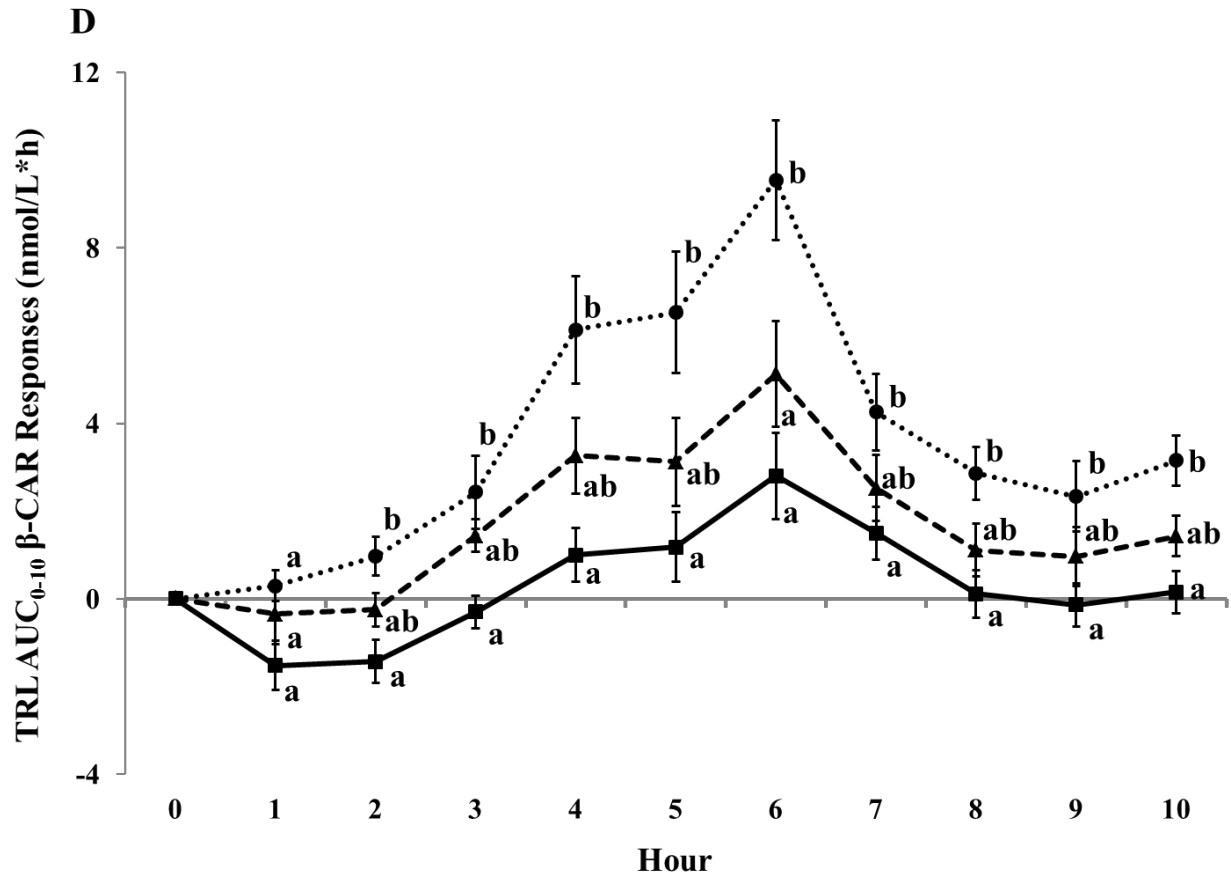

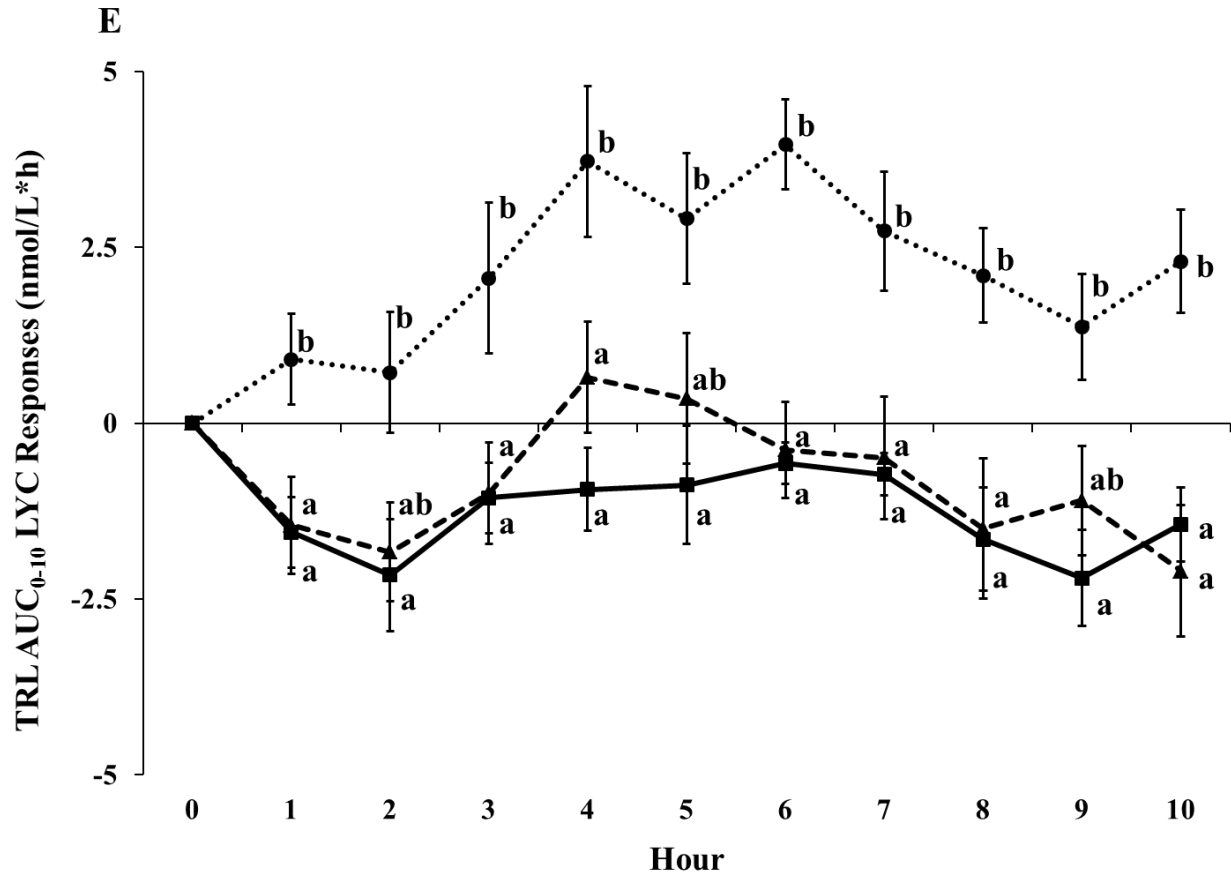

Normalized baseline corrected LUT (A), ZEA (B),  $\alpha$ -CAR (C),  $\beta$ -CAR (D), and LYC (E) contents in TRL fraction during the 10 hour testing day. Different superscript letters indicate statistical differences among the CON, LE, and HE ( $p < 0.001$ ).
